# Supplementary material
Source: publisher figshare collection journal article supplement (https://gsajournals.figshare.com/ndownloader/files/26193620)
Supplement: Supplementary file 1 [file 26193620]

## Sheet: Table S2
Table S2. Lambda values used in Box-Cox transformation of 11 elemental grain phenotypes in the Ames panel
Phenotype	Lambda value
B	-0.5
Ca	0
Cu	-0.5
Fe	0
K	-0.5
Mg	-0.5
Mn	0
Mo	-0.5
Nia	0.5
P	0
Zn	0
aGiven the Box-cox transformation procedure requires strictly positive values, a constant (0.04+1e-9) was added to BLUP values of nickel to make all values positive
